# Supplementary material for: Are blue zones Disappearing?
Source: Research Square preprint supplement (doi:10.21203/rs.3.rs-8497718/v1), 2026-01-27
Supplement: Supplementary file 1 [file 3691d38f41d68abfbf4a5d24.xlsx]

## Sheet: Summary Table e(70)
	Table 2	Life expectancy at age 70 [e(70)], by sex, confidence intervals, and slope change (Sardinia, Okinawa, Nicoya and composite countries (1987-2019)
		e(70) M	95% CI		e(70) (M) slope change	e(70) (M) Country of Origin	95% CI		e(70) (M) Country of Origin slope change	e(70) (M) Composite (France, Japan, Hong Kong)	95% CI		e(70) (M) Composite slope change	e(70) F	95% CI		e(70) (F) slope change	e(70) (F) Country of Origin	95% CI		e(70) (F) Country of Origin slope change	e(70) (F) Composite (France, Japan, Hong Kong)	95% CI		e(70) (F) Composite slope change
			low CI	up CI			low CI	up CI			low CI	up CI			low CI	up CI			low CI	up CI			low CI	up CI
	Sardinia					Italy												Italy
	1987-1991	13.57	13.025	14.1229		11.7545	11.7403	11.7688		12.4714	12.4625	12.4804		15.76	15.2407	16.2845		14.8133	14.8	14.8266		15.7482	15.7397	15.7566
	1997-2001	14.16	13.6264	14.7007	0.059	12.8291	12.8156	12.8425	0	13.5611	13.5528	13.5694	0	16.16	15.668	16.6424	0.04	16.1719	16.1593	16.1844	0.13586	17.5	17.492	17.5079	0
	2008-2012	16.06	15.5445	16.5797	0.172727	14.4618	14.4493	14.4743	0	14.9063	14.8989	14.9136	0	18.76	18.2855	19.2329	0.236364	17.5343	17.5227	17.546	0.123859	19.0731	19.066	19.0802	0
	2015-2019	16.52	15.9773	17.07	0.0657143	15.236	15.2238	15.2481	0	15.7262	15.7193	15.7332	0	19.12	18.6542	19.5818	0.0514286	18.0099	17.9985	18.0212	0.0679341	19.7474	19.7407	19.754	0
	Okinawa					Japan												Japan
	1991	14.38	14.0452	14.7148		12.84	12.805	12.855		12.6949	12.675	12.7149		18.44	18.1429	18.7371		16.1	16.0761	16.1239		16.0865	16.0678	16.1052
	2001	15.02	14.7283	15.3117	0.064	14.12	14.097	14.143	0.128	13.8862	13.8678	13.9046	0	19.76	19.4977	20.0223	0.132	18.35	18.3274	18.3726	0.225	17.9383	17.9206	17.956	0
	2010	15.73	15.4966	15.9634	0.0788889	14.92	14.9005	14.9395	0.0888889	14.9075	14.8912	14.9239	0	20.63	20.4047	20.8553	0.0966667	19.38	19.3508	19.3892	0.114444	19.1057	19.0898	19.1217	0
	2019	16.19	15.9807	16.3993	0.0511111	15.91	15.8919	15.9281	0.11	15.9191	15.9039	15.9344	0	21.11	20.9032	21.3168	0.0533333	20.21	20.1826	20.2174	0.0922222	19.9351	19.9204	19.9497	0
	Nicoya					Costa Rica												Costa Rica
	1995-1999	15.4453	14.9172	15.9734		13.7412	13.6304	13.8521		13.2735	13.265	13.2819		16.4468	15.9026	16.9911		15.4191	15.3062	15.5321		17.089	17.081	17.097
	2005-2009	15.8876	15.424	16.3512	0	14.7302	14.6322	14.8283	0	14.5895	14.5819	14.5971	0	17.9757	17.4668	18.4845	0	16.9668	16.864	17.0696	0	18.8053	18.7979	18.8128	0
	2008-2012	15.9278	15.4653	16.3903	0	14.928	14.8334	15.0227	0	14.9063	14.8989	14.9136	0	18.007	17.5104	18.5036	0	17.1561	17.0589	17.2532	0	19.0731	19.066	19.0802	0
	2015-2019	15.7735	15.3769	16.1701	0	15.3303	15.2464	15.4142	0	15.7262	15.7193	15.7332	0	17.6818	17.2712	18.0923	0	17.4837	17.3989	17.5685	0	19.7474	19.7407	19.754	0
