# Supplementary material for: Are blue zones Disappearing?
Source: Research Square preprint supplement (doi:10.21203/rs.3.rs-8497718/v1), 2026-01-27
Supplement: Supplementary file 2 [file 6c3d349dbf89bfc622bf2d97.xlsx]

## Sheet: Sheet1
		Table 3	Age-adjusted centenarians per 100,000 in Okinawa (1991, 2001, 2010, 2019)
			Okinawa Centenarians per 100,000	Slope	Japan Centenarians per 100,000	Slope	Composite Centenarians per 100,000	slope
		1991	12.8455		2.64105		4.13363
		2001	29.691	1.68455	10.2537	0.761263	11.0153	0.68817
		2010	64.689	3.88866	31.6969	2.14432	24.7535	1.37382
		2019	77.1546	1.38507	54.6669	2.297	36.3504	1.15969
