# Supplementary material for: Are blue zones Disappearing?
Source: Research Square preprint supplement (doi:10.21203/rs.3.rs-8497718/v1), 2026-01-27
Supplement: Supplementary file 3 [file a0e18cfb663d94e44550e33c.docx]

**Supplementary Note 1: Demographic metrics used to identify the Sardinia, Okinawa, and Nicoya blue zones**

Validating blue zones

Validating the presence of a blue zone has been a rigorous process that varies between locales because of capricious data sources and availability. Most population subgroups seeking the blue zone designation have been labeled invalid[[1]](#endnote-1) because of the absence of reliable data, the presence of false or misleading claims of exceptional longevity,[[2]](#endnote-2),[[3]](#endnote-3),[[4]](#endnote-4) or because the people living in these locations simply were not longevity outliers.

Blue zone validation has historically followed several rules: First, the ages of older members of the population must be proven with minimal chance for errors. Second, the observed longevity of the candidate population must be reliably measured using standard demographic metrics. Third, only after the first two criteria are met, then a documented, reliable, comparable, and appropriate demographic frame of reference in other exceptionally long-lived populations (referred to here as ‘composite mortality’) must be identified to illustrate that the purported blue zone is exhibiting outlier status beyond more commonly observed high longevity, survival, and prevalence thresholds.

Three of the original blue zones have now been revalidated in this analysis using newly developed demographic metrics applied to reliable vital statistics from each site. Contained below are the historical validation exercises performed on each of the three blue zones described in this manuscript.

Validation of the Sardinia, Italy blue zone

Sardinia (1999) designation criteria

- Female/male ratio of centenarians
- Extreme Longevity Index (ELI) [defined as the percentage of persons born in Sardinia between 1880 and 1900, who became centenarians.]

Although the existence of an area of unusually low mortality in central Sardinia had been known to demographers since 1961 on the basis of Italian census data,[[5]](#endnote-5) a distinct longevity hotspot in Nuoro province (approximately 23.6 centenarians per 100,000 population, nearly three times the Italian national rate of 7.9/100,000) was identified in 1999 during a survey of all 377 Sardinian municipalities.[[6]](#endnote-6) Moreover, the sex ratio among centenarians in this area was close to parity, a striking deviation from the typical female-dominated sex ratio (3–4:1) observed in most populations.[[7]](#endnote-7),[[8]](#endnote-8),[[9]](#endnote-9),[[10]](#endnote-10),[[11]](#endnote-11) These anomalies, first brought to the attention of the scientific community in 1999,[[12]](#endnote-12) underscored the need for thorough age validation and demographic analysis.

In January 2000, a systematic age validation study of Sardinian centenarians was launched to verify Sardinia’s status as a longevity outlier.[[13]](#endnote-13) Rigorous age-verification procedures were applied: The exceptional ages of all reported centenarians were cross-checked against marginal death annotation on the corresponding birth records to eliminate any cases of age misreporting or duplication.

To quantitatively assess extreme longevity, a cohort life table approach was employed. An “Extreme Longevity Index” (ELI) was defined as the probability that a newborn in a given municipality would survive to age 100 (i.e., the cohort survival probability to 100 years). Specifically, for each municipality, all individuals born between 1880 and 1900 were identified and their survival was tracked to determine how many reached their 100th birthday during the period 1980–2000.By aggregating births over that 20-year span (nearly 500,000 birth records across Sardinia), this approach provided a statistically robust measure of extreme survival.

Importantly, the ELI values are unlikely to be overestimated. This could occur only if some births were missing from the records (lowering the denominator), but here the number of births was obtained directly from original birth registers and all centenarians were identified and age-validated. Nevertheless, ELI values ​​may be slightly underestimated if some newborns reached age 100 outside the municipality of birth without that information being recorded locally. Notably, nearly 30% of Sardinian municipalities had an ELI of 0, indicating that no one born between 1880 and 1900 in those areas survived to centenarian age. This methodology – calculating cohort survival to age 100 and validating each centenarian’s age with official records – ensured that Sardinia’s longevity patterns were grounded in verifiable demographic data rather than reporting artifacts.

Using the ELI data, geographic maps of ELI values across Sardinian municipalities were created. Both smoothed[[14]](#endnote-14) and unsmoothed[[15]](#endnote-15) versions of these maps were produced via spatial analysis. This revealed several clusters of villages, where ELI values ​​were substantially higher than elsewhere on the island, indicating an exceptional concentration of long-livers. Marking these high-longevity villages in blue on a map of Sardinia gave rise to the term “blue zone”. The largest such cluster was located in the central-eastern highlands (encompassing eastern Nuoro province, historically known as the *Ogliastra* subregion) while smaller clusters were scattered in other parts of Sardinia. The major hotspot comprised 14 villages in Ogliastra, where ELI values were substantially higher than in the rest of the island (5.09 centenarians per thousand newborns compared with 1.81 in the rest of Sardinia), highlighting the extraordinary survival rates in that region.

Validation of the Okinawa, Japan blue zone

Okinawa (2001) designation criteria

Source of life tables for Japan, by prefecture.[[16]](#endnote-16) Source of population size for Japan.[[17]](#endnote-17)

- Centenarians per 100,000 population (2001)
- Sex ratio at age 70 (2001)
- e(70) (2001)
- Life expectancy at birth in Okinawa relative to all of Japan
- Per capita centenarian population in Okinawa relative to all of Japan

Comprehensive age‑validation procedures underpin the formal recognition of Okinawa Prefecture as a blue zone. This note summarizes the systems, data sources, and verification methods supporting the reliability of age and mortality data for Okinawa and Japan as a whole.

National and Prefectural Longevity Context

Japan has led the world in life expectancy since surpassing Sweden in the mid‑1970s,[[18]](#endnote-18) primarily due to reductions in cerebrovascular disease and improved hypertension control. Okinawa Prefecture—an isolated island region—has consistently exhibited among the highest longevity levels in Japan since its reversion to Japanese administration in 1972.[[19]](#endnote-19),[[20]](#endnote-20) The Ministry of Health, Labour and Welfare’s *(MHLW) Annual Centenarian Report* ranks Okinawa among the top prefectures for centenarian prevalence.[[21]](#endnote-21) This exceptional profile prompted comprehensive validation of age‑reporting and demographic record‑keeping in the region.

Japan’s Vital Statistics and Registration Systems

Age reporting in Japan is widely considered among the most reliable in the world.[[22]](#endnote-22),[[23]](#endnote-23),[[24]](#endnote-24) The *koseki* (family registry), established in 1872, records all births, deaths, and marriages; it is continuously updated by law and linked to the *jūmin daichō* (resident register, since 1914). These registries are reconciled with quinquennial censuses and the *Vital Statistics of Japan*, maintaining internal consistency.[[25]](#endnote-25)

Since 2002, records have been digitized and cross‑linked nationally, increasing accuracy. Occasional anomalies, such as the disputed case of Shigechiyo Izumi once believed to have lived 120 years, have been re‑evaluated and corrected.[[26]](#endnote-26) Japan’s mortality and age‑reporting integrity are further validated through inclusion in the Human Mortality Database (HMD)—internationally regarded as the *gold standard* for completeness and internal consistency.[[27]](#endnote-27)

Age Validation in Okinawa

Japanese registry reliability has enabled rigorous validation of centenarian records in Okinawa.[[28]](#endnote-28),[[29]](#endnote-29),[[30]](#endnote-30) Saito (2010) highlighted the centrality of family and resident registration in confirming extreme ages,[[31]](#endnote-31) while Poulain and Herm observed continuing longevity advantages in Okinawa’s older cohorts.[[32]](#endnote-32) Reports of “missing centenarians” in 2010 were later explained as clerical mismatches following post‑war relocations and unreported emigrations, rather than falsified ages.[[33]](#endnote-33) Multiple studies have confirmed that Japan’s centenarian data remained demographically sound after these audits.

According to the Annual Centenarian Report,[[34]](#endnote-34)Japan recorded 92,139 centenarians, up ~ 4,000 from 2024, corresponding to 73.6 per 100 000 population nationally. Okinawa Prefecture reported 97.3 per 100 000, maintaining one of Japan’s highest densities, particularly among women.

Year‑to‑year comparisons (2020 → 2025) show steady but modestly slowing growth: national totals rose from ≈ 80 450 to ≈ 92 000 (+ 24 %), while prevalence increased from ≈ 63 to 73.6 per 100 000. Okinawa’s rate climbed from ≈ 84 to 97 per 100 000 (+ 16 %), keeping it among the top two prefectures alongside Shimane. The proportion of women remained ≈ 88 – 89 %, and regional differences narrowed slightly as the digitized registry reduced prefectural disparities.

Earlier field studies verified Okinawan centenarians through direct interviews and cross‑referenced *koseki* records.[[35]](#endnote-35) Age heaping was absent, maximum ages aligned with validated global data, and demographic indicators (e.g. sex ratios, mortality gradients) supported legitimate exceptional longevity.[[36]](#endnote-36),[[37]](#endnote-37),[[38]](#endnote-38) Okinawans also may display genetic isolation and variants—particularly in the *FOXO3A* gene—linked to extended lifespan although specific population based genetic studies remain in their infancy.[[39]](#endnote-39),[[40]](#endnote-40),[[41]](#endnote-41)

Demographic and Statistical Cross‑Validation

Comprehensive checks include:
1.  Inter‑prefectural comparisons confirming that prevalence patterns match national gradients.
2.  Intra‑prefectural validation using reconstructed post‑war registries.
3.  Secular‑trend analysis showing proportional increases with declining mortality.
4.  Maximum‑age consistency with validated longevity data.[[42]](#endnote-42)
5.  Age‑heaping absence confirming accurate age declaration.
6.  Expected sex ratio favoring females.[[43]](#endnote-43)

These methods show random, non‑systematic minor errors and overall registry precision consistent with the highest international standards.

Comparative Data Quality

Japan’s civil registration achieves > 99.9 % coverage of births and deaths, comparable to Sweden and Switzerland and exceeding most countries’ verification capacity. Its inclusion in the HMD places it within the world’s top reliability tier for demographic data. By comparison, even developed nations such as Italy or South Korea display minor inconsistencies at the oldest ages, while low‑ and middle‑income countries lack complete registration systems. Japan’s longevity data thus represent a *global benchmark* for age‑validation integrity.

Summary

Empirical validation confirms that:

- Age‑reporting errors are minimal and randomly distributed.
-  Inter‑ and intra‑prefectural longevity patterns are internally consistent.
-  Post‑WWII registry reconstruction preserved high accuracy.
-  Centenarian prevalence trends correspond with demographic expectations.
-  Female predominance and absence of age heaping support authenticity.

Okinawa’s registry data remain accurate, resilient, and reflective of genuine exceptional longevity. These outcomes confirm Japan’s position as a global leader in demographic data quality and support Okinawa’s enduring classification as a region of verified exceptional survival.

**Validation of the Nicoya, Costa Rica blue zone**

Nicoya’s designation criteria in 2007 was based on field observations by international experts and local unpublished academic papers, which were later published in 2008 and, particularly, 2013 peer-reviewed articles.[[44]](#endnote-44),[[45]](#endnote-45)  A more recent article published in 2023[[46]](#endnote-46) revalidated the exceptional longevity of Nicoyan males but only for cohorts born before the 1940s. It was found that the Nicoya advantage is disappearing in a trend driven mostly by cohort effects.

- Older adult’s death rate ratio (Nicoya / Costa Rica), period 1990-2011
- Period survival from age 60 to 100
- Period (1990-2011) life expectancy at age 60 [e(60)] compared with Japan and Costa Rica.
- Region borders identified with spatial analysis of adult mortality using the “SatScan” procedure[[47]](#endnote-47)
- Biomarkers, diet, health risks, and longitudinal survival follow-up assessed comparatively as part of the Costa Rican Study of Longevity and Healthy Aging (CRELES)[[48]](#endnote-48)

The identification of Nicoya as a longevity hotspot was not based on counts of centenarian or supercentenarian numbers, which are confounded by the high Costa Rican birth rates of the past, migration, and age-exaggeration bias. Instead, it was based on statistical analyses of death rates and survival probabilities among older adults that were estimated using exclusively documented age information from the national birth registry. Costa Rican nationals receive a unique identification card (cédula) upon birth, which allows the linkage of information from various databases, including the death and birth national registries, as well as databases of surviving persons like voting rolls for presidential elections or the CRELES longitudinal study.

The Costa Rican civil registration system, established in 1883, was graded as “complete” by the United Nations in 1961.[[49]](#endnote-49) In a 1999 global study, Costa Rica was one of eleven developing countries with both complete and accurate vital registration statistics.[[50]](#endnote-50) Two recent evaluations of coverage of Costa Rican death and birth registries have concluded that they are complete.[[51]](#endnote-51),[[52]](#endnote-52)  Most importantly, evidence from the CRELES survey confirmed the completeness of registration of deaths of elderly people: out of 566 deaths found during household visits in the survey, only five (less than 1%) were not found in the death registry (they might be registered with a wrong identification), which gives a reasonable assurance that registration of deaths in Costa Rica is essentially complete.

Two main demographic analyses conducted for the period 1990-2011 validated the designation of Nicoya as “blue zone”:[[53]](#endnote-53)

1. Spatial analysis was conducted on quasi-extinct cohorts born before 1920 and alive in 1990 to uncover clusters of significantly lower elderly mortality in Costa Rica. The analysis involved 78,000 death records from 1990 to 2011, along with 2,000 individuals still alive in December 2011 from the voting registry. The SatScan procedure revealed a dominant cluster of lower-than-expected elderly mortality in the Peninsula of Nicoya, encompassing the cantons of Santa Cruz, Carrillo, Nicoya, Hojancha, and Nandayure. The death rate ratio in this cluster was 0.83 (0.80 to 0.86 confidence interval at 95%), significantly lower than the national rate for people born before 1920 (aged 70 and over) during the studied period.
2. A 21-year survival follow-up of a nationally representative sample of 16,300 elderly Costa Ricans, including 923 Nicoyans. In this CRELES longitudinal survey all ages were computed from the dates of births in the national registry. The Nicoyan’s death rate ratio for males 1990–2011 was 0.80 (0.69–0.93 CI) compared to the national rate. For a 60-year-old Nicoyan male in this sample, the probability of becoming centenarian was seven times that of a Japanese male, and his life expectancy was 2.2 years greater. CRELES biomarkers data also showed that Nicoyans have a significant metabolic advantage and they are leaner, taller, suffer fewer disabilities, and less cognitive decline. Two markers of ageing and stress—telomere length and dehydroepiandrosterone sulphate—are also more favorable. The Nicoya diet is prosaic and abundant in traditional foods like rice, beans and animal protein, with low glycemic index and high fiber content.

Bottom line: the validity of Nicoya’s designation as a blue zone is assured by: 1) avoiding misleading self-reported ages and 2) using death registry that has proved to be complete.

1. Poulain, M., Herm, A. Blue Zone, a Demographic Concept and Beyond. *American Journal of Lifestyle Medicine*. (2025). [↑](#endnote-ref-1)
2. Perls, T, Kunkel, L.M., Puca, A.A. The genetics of exceptional human longevity. *J Am Geriatr Soc*. **50**: 359-368 (2002). [↑](#endnote-ref-2)
3. Bennett, N.G., Garson, L.K. Extraordinary longevity in the Soviet Union: Fact or artifact?. *The Gerontologist*, 1986; **26**(4), 358-361 (.1986) [↑](#endnote-ref-3)
4. Mazess, R.B., Forman, S.H. Longevity and age exaggeration in Vilcabamba, Ecuador. *Journal of Gerontology.* **34**(1): 94-98 (1979). [↑](#endnote-ref-4)
5. Esposito M. Dinamiche demografiche dei comuni della Sardegna (1961-2010). In: Dinamiche demografiche in Sardegna tra passato e futuro. Marco Breschi Ed. Udine, Forum 2012. [↑](#endnote-ref-5)
6. Deiana L, Ferrucci L, Pes GM, et al. AKEntAnnos. The Sardinia Study of Extreme

   Longevity. *Aging Clin Exp Res*. **11**(3):142-9 (1999). [↑](#endnote-ref-6)
7. Esposito M. Dinamiche demografiche dei comuni della Sardegna (1961-2010). In: Dinamiche demografiche in Sardegna tra passato e futuro. Marco Breschi Ed. Udine, Forum 2012. [↑](#endnote-ref-7)
8. Deiana L, Ferrucci L, Pes GM, et al. AKEntAnnos. The Sardinia Study of Extreme

   Longevity. *Aging Clin Exp Res*. **11**(3):142-9 (1999). [↑](#endnote-ref-8)
9. Pes GM. The Sardinian Centenarian Study. Research Workshop on “Genes, Genealogy and Longevity”; Max-Planck-Gesellschaft: Montpellier, France, 1999. [↑](#endnote-ref-9)
10. Poulain M, Pes GM, Grasland C, et al. Identification of a geographic area

    characterized by extreme longevity in the Sardinia island: the AKEA study. *Exp Gerontol*. **39**(9):1423-9 (2004). [↑](#endnote-ref-10)
11. Tolu, F., Palermo, M., Dore, M.P., et al. Association of endemic goitre and exceptional longevity in Sardinia: evidence from an ecological study. *Eur J Ageing*. **16**(4):405-414 (2019). [↑](#endnote-ref-11)
12. Pes, G.M. The Sardinian Centenarian Study. Research Workshop on “Genes, Genealogy and Longevity”; Max-Planck-Gesellschaft: Montpellier, France, 1999. [↑](#endnote-ref-12)
13. Poulain M, Pes GM, Grasland C, et al. Identification of a geographic area

    characterized by extreme longevity in the Sardinia island: the AKEA study. Exp Gerontol. 39(9):1423-9 (2004). [↑](#endnote-ref-13)
14. Poulain, M., Pes, G.M., Grasland, C., et al. Identification of a geographic area

    characterized by extreme longevity in the Sardinia island: the AKEA study. Exp Gerontol. 39(9):1423-9 (2004). [↑](#endnote-ref-14)
15. Tolu, F., Palermo, M., Dore, M.P., et al. Association of endemic goitre and exceptional longevity in Sardinia: evidence from an ecological study. *Eur J Ageing*. **16**(4):405-414 (2019). [↑](#endnote-ref-15)
16. https://www.ipss.go.jp/p-toukei/JMD/47/index-en.html [↑](#endnote-ref-16)
17. https://www.e-stat.go.jp/en/stat-search/files?page=1&layout=datalist&toukei=00200524&tstat=000000090001&cycle=7&year=20010&month=0&tclass1=000001011679 [↑](#endnote-ref-17)
18. Ikeda N, Saito E, Kondo N *et al.* What has made the population of Japan healthy? *Lancet* **378**, 1094–1105 (2011). [↑](#endnote-ref-18)
19. Ministry of Health, Labour and Welfare (MHLW). *Vital Statistics of Japan* (annual vols). [↑](#endnote-ref-19)
20. Cabinet Office of Japan. *Annual Report on the Aging Society 2022.* Cabinet Office (2022). [↑](#endnote-ref-20)
21. MHLW. *Annual Centenarian Report.*Japan Ministry of Health, Labour & Welfare, (2025). [↑](#endnote-ref-21)
22. Jeune B & Vaupel J W (eds). *Exceptional Longevity: From Prehistory to the Present.*  (Odense Univ Press, 1995). [↑](#endnote-ref-22)
23. Kono S. Reliability of Japanese population data systems. *Demogr Res* **25**, 235–268 (2011). [↑](#endnote-ref-23)
24. Human Mortality Database. *University of California, Berkeley (USA), and Max Planck*

    *Institute for Demographic Research (Germany).* [www.mortality.org] (accessed Nov 2025). [↑](#endnote-ref-24)
25. Statistics Bureau of Japan. *Census of Japan (1920–2020 editions).* (2021). [↑](#endnote-ref-25)
26. Kono S. Reliability of Japanese population data systems. *Demogr Res* **25**, 235–268 (2011). [↑](#endnote-ref-26)
27. Human Mortality Database. *University of California, Berkeley (USA), and Max Planck*

    *Institute for Demographic Research (Germany).* [www.mortality.org] (accessed Nov 2025). [↑](#endnote-ref-27)
28. Human Mortality Database. *University of California, Berkeley (USA), and Max Planck*

    *Institute for Demographic Research (Germany).* [www.mortality.org] (accessed Nov 2025). [↑](#endnote-ref-28)
29. Wilmoth J R, Skytthe A & Jeune B. *Validation of the longevity of Shigechiyo Izumi.* (Univ  of Southern Denmark Res Rep, 1996). [↑](#endnote-ref-29)
30. Robine J M & Allard M. Validation of extreme longevity cases: The Japanese experience. 71–84 (1999). [↑](#endnote-ref-30)
31. Saito Y. Supercentenarians in Japan. In *Supercentenarians. Demographic Research Monographs* 75–99 (Springer‑Verlag, 2010). [↑](#endnote-ref-31)
32. Poulain M. e*t al.* Blue Zones: Areas of exceptional longevity around the world. *Population* **74**, 281–302 (2019). [↑](#endnote-ref-32)
33. Saito Y, Imai Y & Yasumura S. Verification of centenarian status in Japan after the 2010 registry review. *Jpn J Public Health* **58**, 415–423 (2011). [↑](#endnote-ref-33)
34. MHLW. *Annual Centenarian Report.*Japan Ministry of Health, Labour & Welfare, (2025). [↑](#endnote-ref-34)
35. Willcox, D. C., Willcox, B. J.,Suzuki M. Caloric restriction and human longevity: Lessons from the Okinawans. *Biogerontology* **2**, 153–158 (2001). [↑](#endnote-ref-35)
36. Willcox, D.C., Willcox, B. J., Suzuki M. Caloric restriction and human longevity: Lessons from the Okinawans. *Biogerontology* **2**, 153–158 (2001). [↑](#endnote-ref-36)
37. Gondo, Y *et al.* Functional capacity and longevity among Japanese centenarians. *Geriat Gerontol Int* **6**, 5–17 (2006). [↑](#endnote-ref-37)
38. Willcox D C, Willcox B J, He Q, Wang N C & Suzuki M. They really are that old: Validation of centenarian prevalence in Okinawa. *J Gerontol A Biol Sci Med Sci* **63**, 338–349 (2008). [↑](#endnote-ref-38)
39. Poulain M & Herm A. Exceptional longevity in Okinawa: Demographic trends since 1975. *J Intern Med* **295**, 387–399 (2024). [↑](#endnote-ref-39)
40. Bendjilali N *et al.* Who are the Okinawans? Genome‑wide insights into longevity in an isolated population. *J Gerontol A* **69**, 1474–1484 (2014). [↑](#endnote-ref-40)
41. Nakao R *et al.* Population structure and genetic ancestry of the Okinawan people. *Anthropol Sci* **127**, 83–94 (2019). [↑](#endnote-ref-41)
42. Gondo Y *et al.* Functional capacity and longevity among Japanese centenarians. *Geriat Gerontol Int* **6**, 5–17 (2006). [↑](#endnote-ref-42)
43. Willcox D C, Willcox B J, He Q, Wang N C & Suzuki M. They really are that old: Validation of centenarian prevalence in Okinawa. *J Gerontol A Biol Sci Med Sci* **63**, 338–349 (2008). [↑](#endnote-ref-43)
44. Rosero-Bixby, L., The Exceptionally High Life Expectancy of Costa Rican Nonagenarians. *Demography*, 2008. **45**(3): p. 673-691. [↑](#endnote-ref-44)
45. Rosero-Bixby L, Dow WH, Rehkopf DH. The Nicoya region of Costa Rica: a high longevity island for elderly males. *Vienna Yearb Popul Res*. **11**:109-136. (2013). [↑](#endnote-ref-45)
46. Rosero-Bixby, L., The vanishing advantage of longevity in Nicoya, Costa Rica: A cohort shift. *Demographic Research*. **49**(27): 723-736 (2023). [↑](#endnote-ref-46)
47. <https://www.satscan.org/> [↑](#endnote-ref-47)
48. Rosero-Bixby, L., W.H. Dow, and G. Brenes, Costa Rican Longevity and Healthy Aging Study (CRELES), in Encyclopedia of Gerontology and Population Aging, D. Gu and M. Dupre, Editors. 2021, Springer International Publishing: Cham. p. 1192-1196. DOI 10.1007/978-3-030-22009-9_334. [↑](#endnote-ref-48)
49. United Nations. Demographic Yearbook. New York: United Nations; 1961. [↑](#endnote-ref-49)
50. Hill K, Pande R, Mahy M, Jones G. Trends in Child Mortality in the Developing World 1960 to 1996. New York: UNICEF; 1999. [↑](#endnote-ref-50)
51. Pérez-Brignoli H, López-Ruiz LA. Evaluación de cobertura: estadísticas de nacimiento y defunción Costa Rica 2000-2012. San josé, Costa Rica: Instituto Nacional de Estadística y Censos (INEC); 2017. [↑](#endnote-ref-51)
52. Glei DA, Barbieri M, Santamaría-Ulloa C. Costa Rican mortality 1950-2013: an evaluation of data quality and trends compared with other countries. Demographic research. **40**:835 (2019). [↑](#endnote-ref-52)
53. Rosero-Bixby L, Dow WH, Rehkopf DH. The Nicoya region of Costa Rica: A high longevity island for elderly males. Vienna Yearbook of Population Research 2013. **11**:109-36 (2013). [↑](#endnote-ref-53)
