# Supplementary material for: Are blue zones Disappearing?
Source: Research Square preprint supplement (doi:10.21203/rs.3.rs-8497718/v1), 2026-01-27
Supplement: Supplementary file 4 [file c1407d2388902af273a9a4a9.xlsx]

## Sheet: Summary Table survival 70-100
Table 1	Percent survival from ages 70-100, by sex, and slope changes (Sardinia, Okinawa, Nicoya and composite -- 1987-2019)
	% survival 70-100 (M)	% survival 70-100 (M) slope change	% survival (M) Country of Origin (Italy, Japan, or Costa Rica)	% survival Country of Origin slope change	% survival (M) Composite (France, Japan, Hong Kong)	% survival Composite slope change	% survival 70-100 (F)	Slope Change % survival 70-100 (F)	% survival 70-100 (F) Country of Origin	Slope Change % survival Country of Origin 70-100 (F)	% survival 70-100 (F) Composite (France, Japan, Hong Kong)	Slope Change % survival Composite 70-100 (F)
Sardinia			Italy						Italy
1987-1991	0.63		0.46		0.506667		1.89		1.33		1.82667
1997-2001	1.77	0.114	0.62	0.016	0.976667	0.047	4.22	0.233	2.01	0.068	3.91	0.208333
2008-2012	1.95	0.0163636	1.05	0.0390909	1.6	0.0566667	6.44	0.201818	3.21	0.109091	5.73	0.165455
2015-2019	3.79	0.262857	1.35	0.0428571	2.41333	0.11619	6.93	0.07	3.77	0.08	7.47333	0.249048
Okinawa			Japan						Japan
1991	1.76		0.62		0.646667		6.53		1.94		2.42
2001	2.64	0.088	1.36	0.074	1.33	0.0683333	9.63	0.31	5.44	0.35	5	0.258
2010	2.68	0.00444444	1.53	0.0188889	1.6	0.03	11.3	0.185556	6.7	0.14	5.74	0.0822222
2019	2.96	0.0311111	2.2	0.0744444	2.78333	0.131481	12.37	0.118889	8.23	0.17	8.18	0.271111
Nicoya			Costa Rica						Costa Rica
1995-1999	3.08		1.65		0.933333		3.87		2.62		3.58
2005-2009	3.33	0.025	2.44	0.079	1.57	0.0636667	6.3	0.243	4.95	0.233	5.86667	0.228667
2008-2012	4.45	0.101818	2.82	0.0345455	1.6	0.00272727	8.2	0.172727	5.2	0.0227273	5.73	-0.0124242
2015-2019	4.07	-0.0542857	3.08	0.0371429	2.41333	0.11619	5.26	-0.42	5.46	0.0371429	7.47333	0.249048
