# Supplementary material for: Are blue zones Disappearing?
Source: Research Square preprint supplement (doi:10.21203/rs.3.rs-8497718/v1), 2026-01-27
Supplement: Supplementary file 5 [file d58a8cf9c9ea5c57033d9e83.docx]

**Supplementary Note 3: Validity of blue zones**

Questions about the validity of blue zone populations have recently appeared.[[1]](#endnote-1)It was suggested that the ages of alleged supercentenarians (people documented to be aged 110+) are often subject to age misrepresentation. This problem is both real and well known in demography (see Supplementary Note 2 for a detailed history). However, since there are few if any supercentenarians claimed to have ever existed in any blue zone, this issue is immaterial regarding questions of validity. The only relevant supercentenarian cases that apply to blue zone populations include an alleged 120-year-old man in Okinawa that was proven to be false and subsequently removed from the Japanese registry,[[2]](#endnote-2) and an alleged female supercentenarian from Sardinia who was later discovered to have adopted the identity of her younger sister (who was still quite old when she died at the age of 107.8).[[3]](#endnote-3)

Blue zones are also known to exist in regions that tend to appear socioeconomically depressed relative to national averages and western standards of infrastructure development, community assets, and access to health care. While it might seem logical that long-lived people should not appear with a high frequency in these environments, this phenomenon was noted by Sir William Temple in 1814. Temple indicated that health and long life are usually the blessings of the poor, not the rich, and the fruits of temperance rather than of luxury and excess[[4]](#endnote-4) (Vol. 4, p. 339] – cited from p.18 of William Thoms.[[5]](#endnote-5) The degree and extent of this poverty, and the broader context in which it appears are relevant here. Blue zones are not noted to have extreme hardship that effects many communities globally (e.g. areas with seasonally influenced malnutrition or high rates of endemic infectious disease), but they are not among the most well-resourced.

Mechanistically, there are reasons why this phenomenon can occur. For example, documented cases of indigenous populations exhibit more favorable age-related changes in brain volume and cardiovascular risk relative to people living in developed nations with higher life expectancies.[[6]](#endnote-6) While the overall effect of higher SES is greater longevity in the aggregate in Western countries, exceptional longevity has been observed among subgroups of the population residing in socioeconomically depressed environments.[[7]](#endnote-7) This implies that favorable social determinants of health are not the only attributes of populations that contribute to longevity outlier status, and in some cases such factors may not even be the most important attributes contributing to exceptional longevity.

Other examples include a mortality crossover at later ages between SES-disparate population subgroups where beyond a certain age the less well-off survivors exhibit lower death rates and a higher life expectancy;[[8]](#endnote-8),[[9]](#endnote-9) the Hispanic Paradox where lower SES migrants from Latin America have been known to live longer (although not healthier)[[10]](#endnote-10) than the resident population because they possess fewer harmful behavioral risk factors relative to the country of residence;[[11]](#endnote-11),[[12]](#endnote-12) and a phenomenon related to the collapse of the former Soviet Union in the 1990s – which left behind a challenging economic crisis in Cuba. However, unlike large declines in life expectancy observed in the former Soviet Union during this time, the Cuban population experienced reductions in obesity, diabetes, and stroke and an 18% improvement in total mortality thought to be associated with more exercise and the consumption of home-grown vegetables.[[13]](#endnote-13) During this time of economic depression in Cuba when one might expect longevity metrics to decline, health and longevity actually improved.

It has also been suggested as an extension of the purported low SES/fraudulent age claim, that in some countries with uniform vital registration systems, remarkable longevity is predicted by attributes not normally associated with exceptional longevity such as poverty, low per capita incomes, higher crime rates, etc.However, as scientists have demonstrated for the last 150 years, this is a common phenomenon. There are no a-priori reasons why exceptionally long-lived individuals cannot live with a higher frequency in environments that appear to be disadvantaged using western standards of SES as a frame of reference.

Selective survival[[14]](#endnote-14),[[15]](#endnote-15),[[16]](#endnote-16) (also known as heterogeneity in frailty) has often been posited as an explanation for why William Temple’s 19th century observation about greater longevity among the poor is likely to hold true, but the case of Cuba provides a mechanistic example of how lower SES and an economic depression can actually improve health and longevity. It may also be inappropriate to use western standards for the social determinants of health in regions where the absence of western influences might be an important contributing factor to greater longevity.

What may seem like poor SES standards using Western criteria as a frame of reference could be an active force that lowers the risk of age-related diseases observed later in life among people living in blue zones. For example, extra longevity in high SES environments may be due to medical technology manufacturing survival time for people with unhealthy risk factor profiles while the lower SES environments in blue zones could encourage more physical activity, less obesity, a reduction in caloric intake, less red meat consumption, higher consumption of locally produced fruits and vegetables, and so on. In short, the lower SES environment could, under unique conditions, be a contributing factor to lower risks of age-related diseases at later ages relative to the causes of declining old-age mortality observed among people living in higher SES nations.

Based on the revalidation analysis performed here, there are no legitimate scientific challenges to the validity of pockets of long-lived people residing in the blue zones evaluated here. Their presence (and now the evidence for their receding or disappearance in the case of Okinawa and Nicoya) has been documented.

In fact, there is reason to conclude that there have been no human populations more rigorously validated for the accuracy of ages than those appearing in the original blue zones.

1. Newman SJ. Supercentenarian and remarkable age records exhibit patterns indicative of clerical errors and pension fraud. bioRxiv. 2019 Jul 16:704080. [this manuscript is an open access article that was not peer reviewed]. [↑](#endnote-ref-1)
2. Robine JM, Saito Y. Survival beyond age 100: the case of Japan. Popul Dev Rev. 2003;29:208–228. [↑](#endnote-ref-2)
3. Poulain M, Pes GM, Carru C, Baggio G, Franceschi C, Ferrucci L, Deiana L. The Validation of a Population of Exceptional Longevity in Sardinia. In IUSSP seminar on longevity held in Montpellier in 2000. [↑](#endnote-ref-3)
4. Temple W. The Works of Sir William Temple, 1: Complete. S. Hamilton; 1814. [↑](#endnote-ref-4)
5. Thoms WJ. Human Longevity Its Facts and Its Fictions, Including an Inquiry Into Some of the More Remarkable Instances, and Suggestions for Testing Reputed Cases by Will. J. Thoms. Murray; 1873. [↑](#endnote-ref-5)
6. Irimia A, Chaudhari NN, Robles DJ, Rostowsky KA, Maher AS, Chowdhury NF, Calvillo M, Ngo V, Gatz M, Mack WJ, Law EM. The indigenous South American Tsimane exhibit relatively modest decrease in brain volume with age despite high systemic inflammation. The Journals of Gerontology: Series A. 2021 Dec 1;76(12):2147-55. [↑](#endnote-ref-6)
7. Liu X, Witten M. A biologically based explanation for mortality crossover in human populations. Gerontologist. 1995 Oct;35(5):609-15. doi: 10.1093/geront/35.5.609. PMID: 8543217. [↑](#endnote-ref-7)
8. Nam CB, Weatherby NL, Ockay KA. Causes of death which contribute to the mortality crossover effect. Social Biology. 1978 Dec 1;25(4):306-14. [↑](#endnote-ref-8)
9. Johnson NE. The racial crossover in comorbidity, disability, and mortality. Demography. 2000 Aug;37(3):267-83. [↑](#endnote-ref-9)
10. Hayward MD, Hummer RA, Chiu CT, González-González C, Wong R. Does the Hispanic paradox in US adult mortality extend to disability?. Population research and policy review. 2014 Feb;33(1):81-96. [↑](#endnote-ref-10)
11. Lariscy JT, Hummer RA, Hayward MD. Hispanic older adult mortality in the United States: New estimates and an assessment of factors shaping the Hispanic paradox. Demography. 2015 Feb 1;52(1):1-4. [↑](#endnote-ref-11)
12. Crimmins EM, Kim JK, Alley DE, Karlamangla A, Seeman T. Hispanic paradox in biological risk profiles. American journal of public health. 2007 Jul;97(7):1305-10. [↑](#endnote-ref-12)
13. Borowy I. Similar but different: health and economic crisis in 1990s Cuba and Russia. Social science & medicine. 2011 May 1;72(9):1489-98. [↑](#endnote-ref-13)
14. Markides KS, Machalek R. Selective survival, aging, and society. Growing old in America. 2020 Mar 2:187-205. [↑](#endnote-ref-14)
15. Barbi, E., G. Caselli, and J. Vallin. 2003. “Trajectories of Extreme Survival in Heterogeneous Populations.” Population (English ed.) 58:43–65. [↑](#endnote-ref-15)
16. Horiuchi, S. and J.R. Wilmoth. 1998. “Deceleration in the Age Pattern of Mortality at Older Ages.” Demography 35:391–412. [↑](#endnote-ref-16)
