# Supplementary material for: Are blue zones Disappearing?
Source: Research Square preprint supplement (doi:10.21203/rs.3.rs-8497718/v1), 2026-01-27
Supplement: Supplementary file 6 [file eb57154e2e8dc8da228ba99e.docx]

**Supplementary Note 2: Age Misrepresentation, Exaggeration, and Misreporting in Demography and Aging Science**

***Age misrepresentation*** is defined as the inaccurate reporting of an individual's chronological age, whether intentional or unintentional; *Age misreporting* is a term often used synonymously with age misrepresentation. This inaccuracy, when it occurs on a larger scale, can significantly alter population-level counts of the number of people of a given age (especially at extreme ages beyond 100[[1]](#endnote-1)) and regional and national vital statistics such as death rates, life expectancies, and survival estimates. *Age exaggeration* is an overstatement of age commonly observed after age 70 and with a higher frequency among populations with unreliable birth records.[[2]](#endnote-2) This was also a common phenomenon during World War II as some underage individuals exaggerated their ages so they could enlist in the military. A*ge understatement* occurs when people report their chronological age as younger than they are and *age heaping* is a form of misrepresentation that occurs when individuals round their age to the nearest number ending in 0 or 5.

**Referred to here in general as *age misrepresentation*, these phenomena have been the subject of intense interest in demography since the 1960s when claims of exceptional longevity became more common, although cases of invalidated claims of exceptional longevity have been made and formally described since the 19th century.**[[3]](#endnote-3) **Two cases of historical age misrepresentation are of particular interest. Thomas Parr was an Englishman allegedly born in 1483 who died in 1635 and was buried in Westminster Abbey with the inscription on his tombstone (still visible today) that he was 152 years of age at the time of his death. Aside from the fact that Parr’s birth date and chronological age could never be scientifically verified, Parr had no memory of majority historical events when he would have been old enough to remember them (e.g., the death of king Edward VII and the reign of Henry VIII), and an autopsy revealed highly improbable health attributes that are associated with a chronological age that was decades younger.**[[4]](#endnote-4)**,**[[5]](#endnote-5)**The second case is that of Henry Jenkins – also an Englishman allegedly born in 1501 and buried in 1670 at the asserted age of 169 – also with no validated birth records. These two historical cases among many others have been thoroughly discussed and debunked in the scientific literature as little more than a cult-like belief in stories of exceptional longevity.**[[6]](#endnote-6)**,**[[7]](#endnote-7)**,**[[8]](#endnote-8)**,**[[9]](#endnote-9)

**Age misrepresentation in alleged long-lived populations.** The overstatement of age has been documented by demographers as a common phenomenon mostly among people aged 70 and older when it does happen. This may occur for a variety of reasons – some intentional and sometimes unintentional – but most often a result of the loss of vital records, memory loss, or due to social factors and financial incentives associated with being older.[[10]](#endnote-10)

The case of Vilcabamba, Ecuador is a case in point since it was originally considered in the 1970s as the equivalent of a modern blue zone when first described as a longevity hotspot. A systematic investigation of Vilcabamba was conducted in the late 1970s and reported in the scientific literature by Mazess and Forman.[[11]](#endnote-11) Vilcabamba is a small town in southern Ecuador that the popular media claimed had a reported high number of centenarians and nonagenarians – with some claiming to have lived longer than 120. Researchers hypothesized that the reported high ages might have been due to inaccurate self-reporting of age, illiteracy, loss of vital records, and/or genealogical confusion.

The test this hypothesis, the researchers conducted a household census in 1974, capturing about 80% of the town’s ~1,100 residents. They reconstructed genealogies and cross-referenced reported ages with baptismal, birth, marriage, and death records from civil and clerical sources dating from the1860s. Estimated birth years were also derived from legal documents. The use of genealogies permitted indisputable identification of each individual in the church and civil records in spite of challenges due to name duplication and poor-quality records. They verified actual ages for 95 living adults and 24 recently deceased persons, supplemented by estimated ages for an additional 60 individuals.

Results indicated that before age 70 age was reported accurately, but after age 70 there was systematic age exaggeration. On average, anyone claiming to be age 100 was likely to be closer to age 84; those claiming to have reached the age of 130 were more likely aged ~95; and of the 23 people claiming to be centenarians (13 living and 10 deceased), none had actually reached age 100. The mean verified ages of the alleged nonagenarians was 81.5 years. While Vilcabamba did exhibit a modestly elevated proportion of residents over age 60 relative to national averages (10.6% vs. 6% national average), this was largely due to outmigration of younger people and in-migration of older individuals. The most likely causes of age exaggeration in Vilcabamba include the social prestige and local cultural significance associated with having attained extreme old age, and tourism associated with an alleged longevity hotspot.

Various regions of the former Soviet Union also stand out with regard to age misrepresentation. Medvedev[[12]](#endnote-12) questioned reports of extreme longevity in the Caucasus and other areas of the Soviet Union by pointing out that regions with the highest reported percentage of centenarians are primarily in areas where births were not registered when the alleged centenarians were born, or births were registered in churches whose records were subsequently destroyed – similar to Okinawa (see Supplementary Note 4). There were also political reasons why a large number of centenarians were reported in Soviet Georgia, and some men sought to avoid conscription into the Soviet army by using their father’s or grandfather’s birth documents. Joseph Stalin was a Georgian and according to Medvedev (1974, p.387) Stalin enjoyed listening to tales of Georgian longevity, and local authorities "tried their best to find more and more cases to prove this belief".

**Bennett and Garson**[[13]](#endnote-13)**examined claims of extreme longevity in the Soviet Union based on the 1959 and 1970 censuses using newly developed demographic modeling techniques.** Using a non-stable population model on published life tables and intercensal population growth rates, the authors estimated population counts at older ages relative to what was reported – allowing for the identification and measurement of potential discrepancies. It was estimated that the true centenarian count was at least 28.9 percent overstated for males and 7.5 percent overstated for females. When reliable data from Sweden was used as a frame of reference, the actual centenarian count in Vilcabamba could have been as low as 2% of the reported figures. The most pronounced discrepancies occurred in the Central Asian and Caucasus republics. The primary causes of the age misrepresentation included the social prestige associated with claims of extreme longevity and incomplete documentation of age.

Nepomuceno and Turra similarly examined claims of having a large centenarian population in Brazil in the 20th century using all available censuses and non-stable population model techniques (e.g. variable-r).[[14]](#endnote-14) Census data suggested a large number of centenarians with a rapidly growth rate: the centenarian population appeared to be about 4,438 people in 1900 with an increase of two and a half times between 1960 and 2000, reaching about 24,000 people by 2000. In contrast, the authors’ estimates suggest a much smaller number of centenarians. They found Brazil likely had no centenarians in the first two decades of the 20th century, with the centenarian population beginning to grow only in the 1940s — reaching about 100 people by 1960 and about 1000 people by the year 2000 (about 80% women). The discrepancy in the number of centenarians—1,000 estimated by the authors versus 24,000 reported in the census—confirms that previous reports of centenarians in the country likely resulted from age exaggeration.

**Age misrepresentation in the United States. The actual number of centenarians in the U.S. in 1960 according to a reassessment of the census was about 3,700 instead of the initially reported 10,326; and among non-whites there were only about 250 centenarians instead of the 2,800 reported in the census.**[[15]](#endnote-15) **This reporting error occurred because the number of centenarians was estimated from an inflated sample of the population aged 85 and older instead of using a complete enumeration by age. There were likely to have been no residents that were supercentenarians in the 1960 census. This type of reporting error was observed in the U.S. as far back as the 1930s.**[[16]](#endnote-16) **A thorough assessment of the 1950, 1960, and 1970 censuses of the United States suggested that 95% of the 106,000 reported centenarians in the 1970 census were actually under the age of 100.**[[17]](#endnote-17)

**National vital statistics such as death rates and life expectancy at older ages have been significantly influenced by age misrepresentation. In 1910 after the decennial census was complete, researchers at the Census Bureau concluded, after analyzing the count of the centenarian population, that persons of advanced age, not knowing their true age, tend to make exaggerated guesses.**[[18]](#endnote-18) **When researchers used Medicare enrollment data from the Social Security Administration file**[[19]](#endnote-19) **instead of national reported deaths from the National Death Master File or Medicare enrollment data from the Health Care Financing Administration, it was demonstrated that actual death rates were significantly higher at older ages, and the population count at extreme ages were lower, than previously thought – in part, due to age misrepresentation at extreme ages.** To correct for age misreporting, researchers employ methods such as **age-heaping indices** (e.g., Myers’ Index, Whipple’s Index), **record linkage**, and **regression models** comparing stated versus documented ages. The integration of **collateral documents** (marriage, childbirth, and census records) also supports more accurate age validation.[[20]](#endnote-20)

**For excellent reviews of age misrepresentation in the modern era and its implications for national vital statistics, population counts at extreme ages and especially among centenarians and supercentenarians, the following articles provide a comprehensive perspective on these issues.**[[21]](#endnote-21)**,**[[22]](#endnote-22)**,**[[23]](#endnote-23)**,**[[24]](#endnote-24)

1. Coale, A.J., Kisker, E.E. Mortality Crossovers: Reality or Bad Data? *Population Studies*, **40**, 389–401 (1986). [↑](#endnote-ref-1)
2. Palloni, A., Beltrán-Sánchez, H., Pinto, G. Estimation of older-adult mortality from information distorted by systematic age misreporting. *Population Studies*. **75**, 403–420 (2021). [↑](#endnote-ref-2)
3. Thoms, W.J. Human longevity, its facts and its fictions. John Murray, London.

   [https://books.google.com/books?hl=en&lr=&id=QPm3i8UficwC&oi=fnd&pg=PA1&dq=thoms+1873+Human+longevity,+its+facts+and+its+fictions.&ots=opKJNIc0Rh&sig=cQwdim6cpbS3ofzS005KqVlsAwk#v=onepage&q=thoms%201873%20Human%20longevity%2C%20its%20facts%20and%20its%20fictions.&f=false] (1873). [↑](#endnote-ref-3)
4. Doughty, B.P. Old Parr: or how old is old? *South Med J*. **81**, 906-8 (1988). [↑](#endnote-ref-4)
5. Pitskhelauri, G.Z. William Harvey and the anatomo-pathological dissection he performed on Thomas Parr's corpse (on the occasion of the 400 years anniversary of W. Harvey's birth). *Sante Publique (Bucur)*. **21**, 141-5 (1978). [↑](#endnote-ref-5)
6. Gjonça, A. Jeune, B., Vaupel, J.W. (eds.) Validation of Exceptional Longevity. European Journal of Population. **17**, 201 (2001). [↑](#endnote-ref-6)
7. Cooper, T.J. Three Score Years and Ten: or More?: A Study of Cult Interest in People of Extraordinary Age and its Origins in the Seventeenth to Nineteenth Centuries. *Austin Macauley Publishers* (2024). [↑](#endnote-ref-7)
8. Laslett, P. The bewildering history of the history of longevity. *Validation of exceptional longevity*. 23-40 (1999). [↑](#endnote-ref-8)
9. Petersen, L.L., Jeune, B. Age Validation of Centenarians in the Luxdorph Gallery. In Validation of exceptional longevity. (pp. 41-64). Syddansk Universitetsforlag (1999). [↑](#endnote-ref-9)
10. Budd, J., Guinnane, T. Intentional Age Misreporting in Irish Pension Applications. The Journal of Economic History. **51**, 113–122 (1991). [↑](#endnote-ref-10)
11. Mazess, R.B., Forman, S.H. Longevity and Age Exaggeration in Vilcabamba, Ecuador. *The Gerontologist*. **19**, 435–442 (1979). [↑](#endnote-ref-11)
12. Medvedev, Z.A. Caucasus and Altay longevity: A biological or social problem? *The Gerontologist*. **14**, 381-387 (1974). [↑](#endnote-ref-12)
13. Bennett, N.G., Garson, L.K. The centenarian question and old-age mortality in the Soviet Union, 1959–1970. *Demography*. **20**, 587–606 (1983). [↑](#endnote-ref-13)
14. Nepomuceno, M.R., Turra, C.M. The Population of Centenarians in Brazil: Historical Estimates from 1900 to 2000. *Population and Development Review*. **46**, 813–833 (2020). [↑](#endnote-ref-14)
15. Myers, R.J. Validity of Centenarian Data in the 1960 Census. Demography. **3**, 470–476 (1966). [↑](#endnote-ref-15)
16. Bowerman, W.G, Centenarians. *Transactions of the Actuarial Society of America.* **40**, 360-378 (1939). [↑](#endnote-ref-16)
17. Siegel, J.S., Passel, J.S. New Estimates of the Number of Centenarians in the United States.” *Journal of the American Statistical Association.* **71**, 559–66 (1976). https://doi.org/10.2307/2285583. [↑](#endnote-ref-17)
18. U. S. Bureau of the Census, Thirteenth Census of the United States: 1910, Vol. I, Washington, p. 294. (1913). [↑](#endnote-ref-18)
19. Kestenbaum, B. A Description of the Extreme Aged Population Based on Improved Medicare Enrollment Data. *Demography.* **29**, 565–80 (1992). [↑](#endnote-ref-19)
20. Ediev, D. Simulating Age Exaggeration Effects in Demographic Data. In Demographic Research. (2018). [↑](#endnote-ref-20)
21. Robine, J.M. Extreme Longevity and Data Quality. *Annual Review of Gerontology & Geriatrics*. **27**, 151. (2007). [↑](#endnote-ref-21)
22. Preston, S.H., Elo, I.T., Stewart, Q. Effects of Age Misreporting on Mortality Estimates at Older Ages. Population Studies Center Research Report. (1999). [↑](#endnote-ref-22)
23. Rosenwaike, I. On Measuring the Extreme Aged in the Population*.* Journal of the American Statistical Association*.* **63**, 29–40 (1968). [↑](#endnote-ref-23)
24. Poulain, M. Exceptional longevity in Okinawa: A plea for in-depth validation. *Demographic Research* **25**, 245-284 (2011). [↑](#endnote-ref-24)
